# Supplementary material for: [4Fe-4S] cluster trafficking mediated by Arabidopsis mitochondrial ISCA and NFU proteins
Source: PubMed Central journal article supplement (PMC7939391; doi:10.1074/jbc.ra120.015726), 2021-01-13
Supplement: mmc1.pdf [file mmc1.pdf]

Supporting information for the manuscript

**[4Fe-4S] cluster trafficking mediated by Arabidopsis mitochondrial ISCA and NFU proteins**

**Tamanna Azam, Jonathan Przybyla-Toscano, Florence Vignols, Jérémy Couturier, Nicolas Rouhier, and Michael K. Johnson**

**Figure S1. BiFC negative controls verifying that none of the ISCA proteins tested alone with the empty partner vector can restore YFP fluorescence.**

**Figure S2. Control studies supporting unidirectional [4Fe-4S] cluster transfer from ISCA1a/2 to NFU4 and NFU5.**

**Table S1. Primers used in this study.**

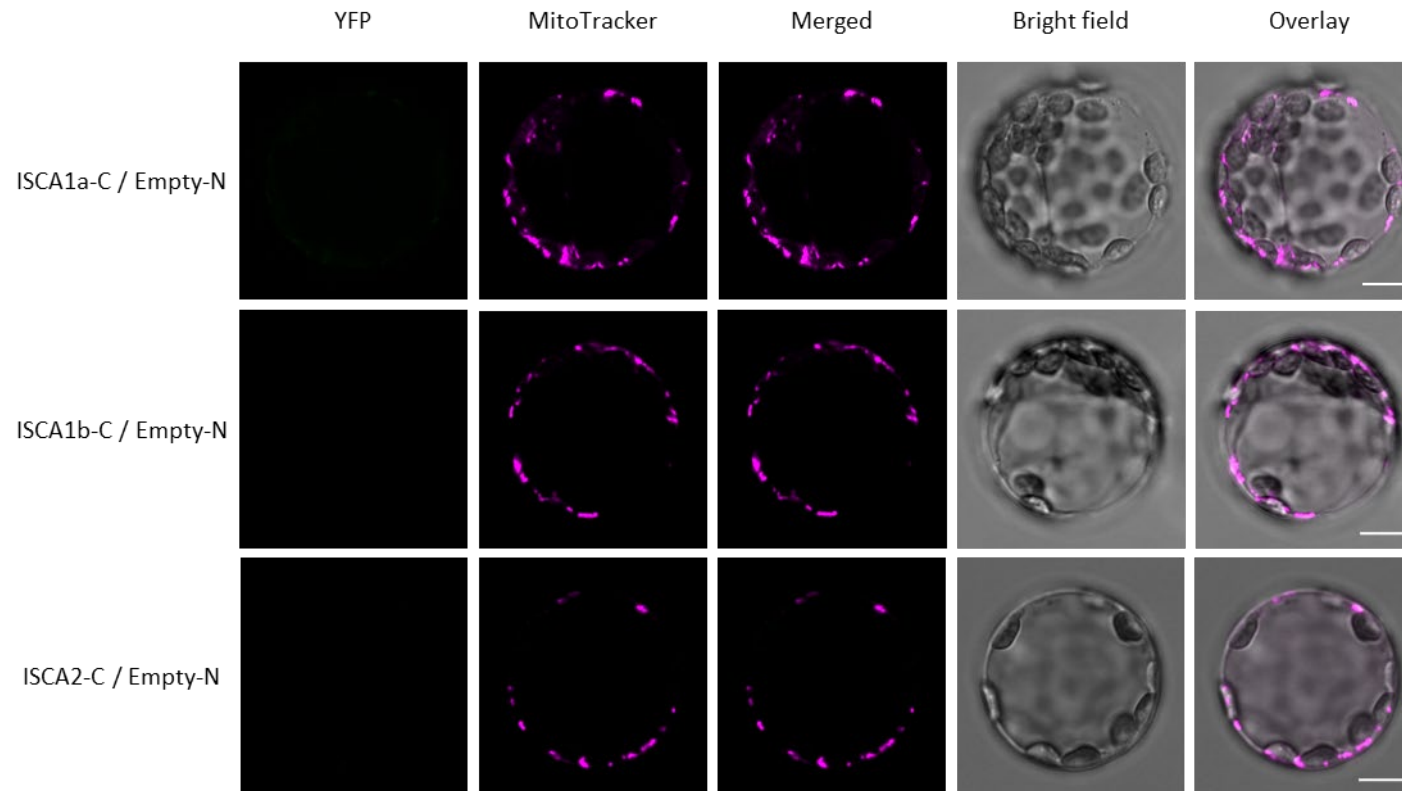

**Figure S1. BiFC negative controls verifying that none of the ISCA proteins tested alone with the empty partner vector can restore YFP fluorescence.** ISCA-C/empty-N vector pairwise were assayed in Arabidopsis protoplasts isolated from 4 week-old plants in the same conditions as those described for ISCA-C/NFU-N pairwise in Figure 2. Confocal images were captured without Z-stack intensity projection. YFP, yellow fluorescent protein. MitoTracker® Orange CMXRos (Invitrogen) was used at 100 nM to label mitochondria within cells. Bars = 10  $\mu$ m.

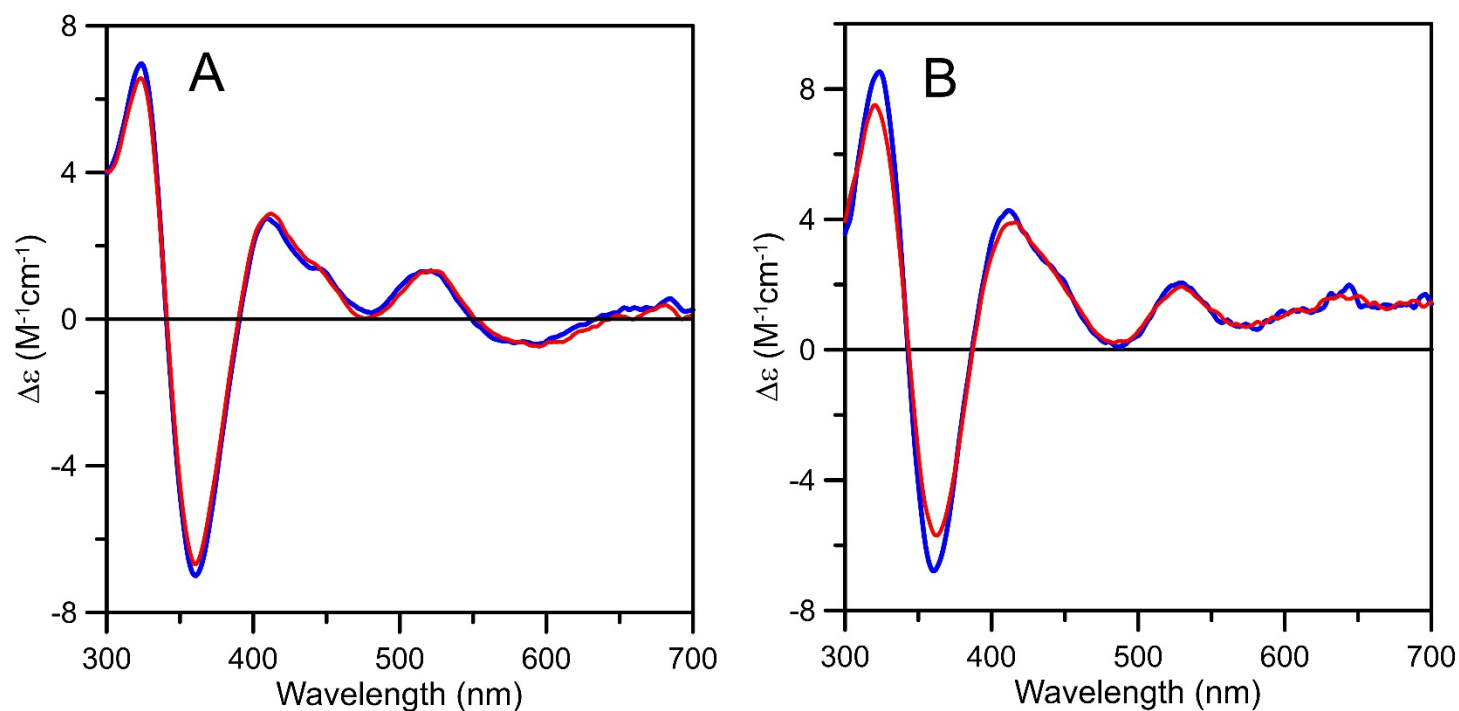

**Figure S2. Control studies supporting unidirectional [4Fe-4S] cluster transfer from ISCA1a/2 to NFU4 and NFU5.** Attempted [4Fe-4S] cluster transfer from *At* holo-NFU4 (A) and *At* holo-NFU5 (B) to DTT-pretreated *At* apo-ISCA1a/2, monitored by CD spectroscopy as a function of time. CD spectra of the reaction mixture that was initially 50  $\mu\text{M}$  in holo-NFU4 or NFU5 and 80  $\mu\text{M}$  in apo-ISCA1a/2 heterodimers. The blue lines correspond to holo-NFU4 or holo-NFU5 recorded before addition of apo-ISCA1a/2. The red lines correspond to the CD spectra recorded 45 min after the addition of apo-ISCA1a/2. [4Fe-4S] cluster-bound ISCA1a/2 has negligible visible CD, see manuscript text. Consequently, the lack of a significant decrease in the visible CD intensity of [4Fe-4S] cluster-bound NFU4 and NFU5 indicates negligible [4Fe-4S] cluster transfer. The reaction conditions were the same as those used for the successful reverse cluster transfers shown in Figs. 5 and 6.

**Table S1. Primers used in this study.** Restriction sites required for cloning are in red. For nuclear-encoded plastidial proteins, the sequences coding for the putative targeting sequences have been removed for the cloning in pET and pGADT7/pGBKT7 vectors whereas full-length sequences have been cloned in pUC-SPYNE/SPYCE vectors. Note that a BsmBI type IIs restriction enzyme was used in the ACO2 for primer to generate a compatible NcoI extremity. Primers for cloning GRXS15, BOLA4 in pGADT7/pGBKT7 vectors, are described in (1). The N-terminal domains of NFU4 and NFU5 have been cloned using AtNFU4 for and AtNFU4 rev3 or using AtNFU5 for and AtNFU5 rev3 whereas the C-terminal domains of NFU4 and NFU5 have been cloned using AtNFU4/5 for and AtNFU4 rev or AtNFU5 rev.

| Gene names | Plasmids                           | Primer names  | Sequences                                 | N-terminal sequences |
|------------|------------------------------------|---------------|-------------------------------------------|----------------------|
| NFU4       | pET3d, pGADT7, pGBKT7              | AtNFU4 for    | 5' CCCCATGGCTTTTATCCAAACCCAATCA 3'        | MAFIQTQS             |
|            |                                    | AtNFU4 rev    | 5' CCCC GGATCCCTACTCTACTCTCATCTC 3'       |                      |
|            | pUC-SPYNE/SPYCE                    | AtNFU4 for2   | 5' CCCCTCTAGAAATGAAAGGGATTGCGAGG 3'       | MKGIAR               |
|            |                                    | AtNFU4 rev2   | 5' CCCCCTCGAGCTCTACTCTCATCTCTCC 3'        |                      |
|            | pGADT7, pGBKT7                     | AtNFU4/5 for  | 5' CCCCCCCC CATATGGAGGATGACTCTGAAAC 3'    | MEDDSE               |
|            |                                    | AtNFU4 rev3   | 5' CCCC GGATCCTTAGCCAGAAGAATAGAAATC 3'    |                      |
| NFU5       | pET3d, pGADT7, pGBKT7              | AtNFU5 for    | 5' CCCCATGGCTTTTATCCAAACC 3'              | MAFIQT               |
|            |                                    | AtNFU5 rev    | 5' CCCC GGATCCTCACTCCATTGGACCAGA 3'       |                      |
|            | pUC-SPYNE/SPYCE                    | AtNFU5 for2   | 5' CCCCTCTAGAAATGAAAGGGCTTACGAGG 3'       | MKGLTR               |
|            |                                    | AtNFU5 rev2   | 5' CCCCCTCGAGCTCCATTGGACCAGAAGA 3'        |                      |
|            | pGADT7, pGBKT7                     | AtNFU5 rev3   | 5' CCCC GGATCCTTAACCAGAAGAGTAAAAGTC 3'    |                      |
| ACO2       | pET15b                             | AtACO2 for    | 5' CCCCCCGTCTCCATGGCTTCTGAGCATTCCCTACA 3' | MASEHSY              |
|            |                                    | AtACO2 rev    | 5' CCCCCTCGAGTACTTGGCGCTCAAAC 3'          |                      |
| IBA57.1    | pGADT7, pGBKT7                     | AtIBA57.1 for | 5' CCCCCCCC CATATGGCGTCTCGCCTTAAATC 3'    | MASRLK               |
|            |                                    | AtIBA57.1 rev | 5' CCCC GAATTCCTACGCTGCAGCAACTC 3'        |                      |
| INDH       | pGADT7, pGBKT7                     | AtINDH for    | 5' CCCCATATGGCTCTCCGACTACACGGAGTCAAA 3'   | MALRLHGVK            |
|            |                                    | AtINDH rev    | 5' CCC GGATCCCTATGATGAGTGGCTAGAATG 3'     |                      |
| ISCA1a     | pET28a, pCDFDUET<br>pGADT7, pGBKT7 | AtISCA1a for  | 5' CCCCCCCC CATATGAAGCAAGTATTAAC 3'       | MKQVLT               |
|            |                                    | AtISCA1a rev  | 5' CCCC GGATCCTTAACTAGCACTCTGCTT 3'       |                      |
|            | pUC-SPYNE/SPYCE                    | AtISCA1a for2 | 5' CCCCTCTAGAAATGAAAGCTTCTCAAATT3'        | MKASQI               |
|            |                                    | AtISCA1a rev2 | 5' CCCCCTCGAGACTAGCACTCTGCTTAGC3'         |                      |
| ISCA1b     | pGADT7, pGBKT7                     | AtISCA1b for  | 5' CCCCCCCC CATATGCGAAAGCAAGTATTAGCA 3'   | MRKQVLA              |

|       |                        |               |                                                |        |
|-------|------------------------|---------------|------------------------------------------------|--------|
|       |                        | AtISCA1b rev  | 5' CCCC <b>GGATCCT</b> CATGTTGTCGTGAATGACTC 3' |        |
|       | pUC-SPYNE/SPYCE        | AtISCA1bfor2  | 5' CCC <b>CTCTAGA</b> ATGAGAAAGCAAGTATTA 3'    | MRKQVL |
|       |                        | AtISCA1b rev2 | 5' CCCC <b>CTCGAGT</b> GTTGTCGTGAATGACTC 3'    |        |
| ISCA2 | pET12a, pGADT7, pGBKT7 | AtISCA2 for   | 5' CCCCCC <b>CATATG</b> TCCCAACCTGAATCG 3'     | MSQPES |
|       |                        | AtISCA2 rev   | 5' CCCC <b>GGATCCT</b> CAGAGTTTCACCATGAA 3'    |        |
|       | pCDFDUET               | AtISCA2 rev2  | 5' CCCC <b>CTCGAG</b> GAGTTTCACCATGAAGGA 3'    |        |
|       | pUC-SPYNE/SPYCE        | AtISCA2 for2  | 5' CCC <b>CTCTAGA</b> ATGTCAAGATCTCTGGTG 3'    | MSRSLV |
|       |                        | AtISCA2 rev3  | 5' CCCC <b>CTCGAG</b> GAGTTTCACCATGAAGGA 3'    |        |

### Reference

Couturier, J., Wu, H.-C., Dhalleine, T., Pégeot, H., Sudre, D., Gualberto, J. M., Jacquot, J.-P., Gaymard, F., Vignols, F., and Rouhier, N. (2014) Monothiol glutaredoxin-BolA interactions: Redox control of *Arabidopsis thaliana* BolA2 and SufE1. *Mol. Plant* 7, 187–205
